# Supplementary material
Source: PubMed Central journal article supplement (PMC7650007)
Supplement: MD-011-D0MD00137F-s001.pdf [file MD-011-D0MD00137F-s001.pdf]

## Supplementary Information

### Differently fluorescence-labeled dibenzodiazepinone-type muscarinic acetylcholine receptor ligands with high M<sub>2</sub>R affinity

Corinna G. Gruber, Andrea Pegoli, Christoph Müller, Lukas Grätz, Xueke She and Max Keller\*

Institute of Pharmacy, Faculty of Chemistry and Pharmacy, University of Regensburg, Universitätsstrasse 31, D-93053 Regensburg, Germany

| Content                                                 | Page |
|---------------------------------------------------------|------|
| 1. Figures S1-S4                                        | S2   |
| 2. RP-HPLC chromatograms of compounds <b>15-20</b>      | S5   |
| 3. <sup>1</sup> H-NMR spectra of compounds <b>15-20</b> | S7   |

## 1. Figures S1-S4

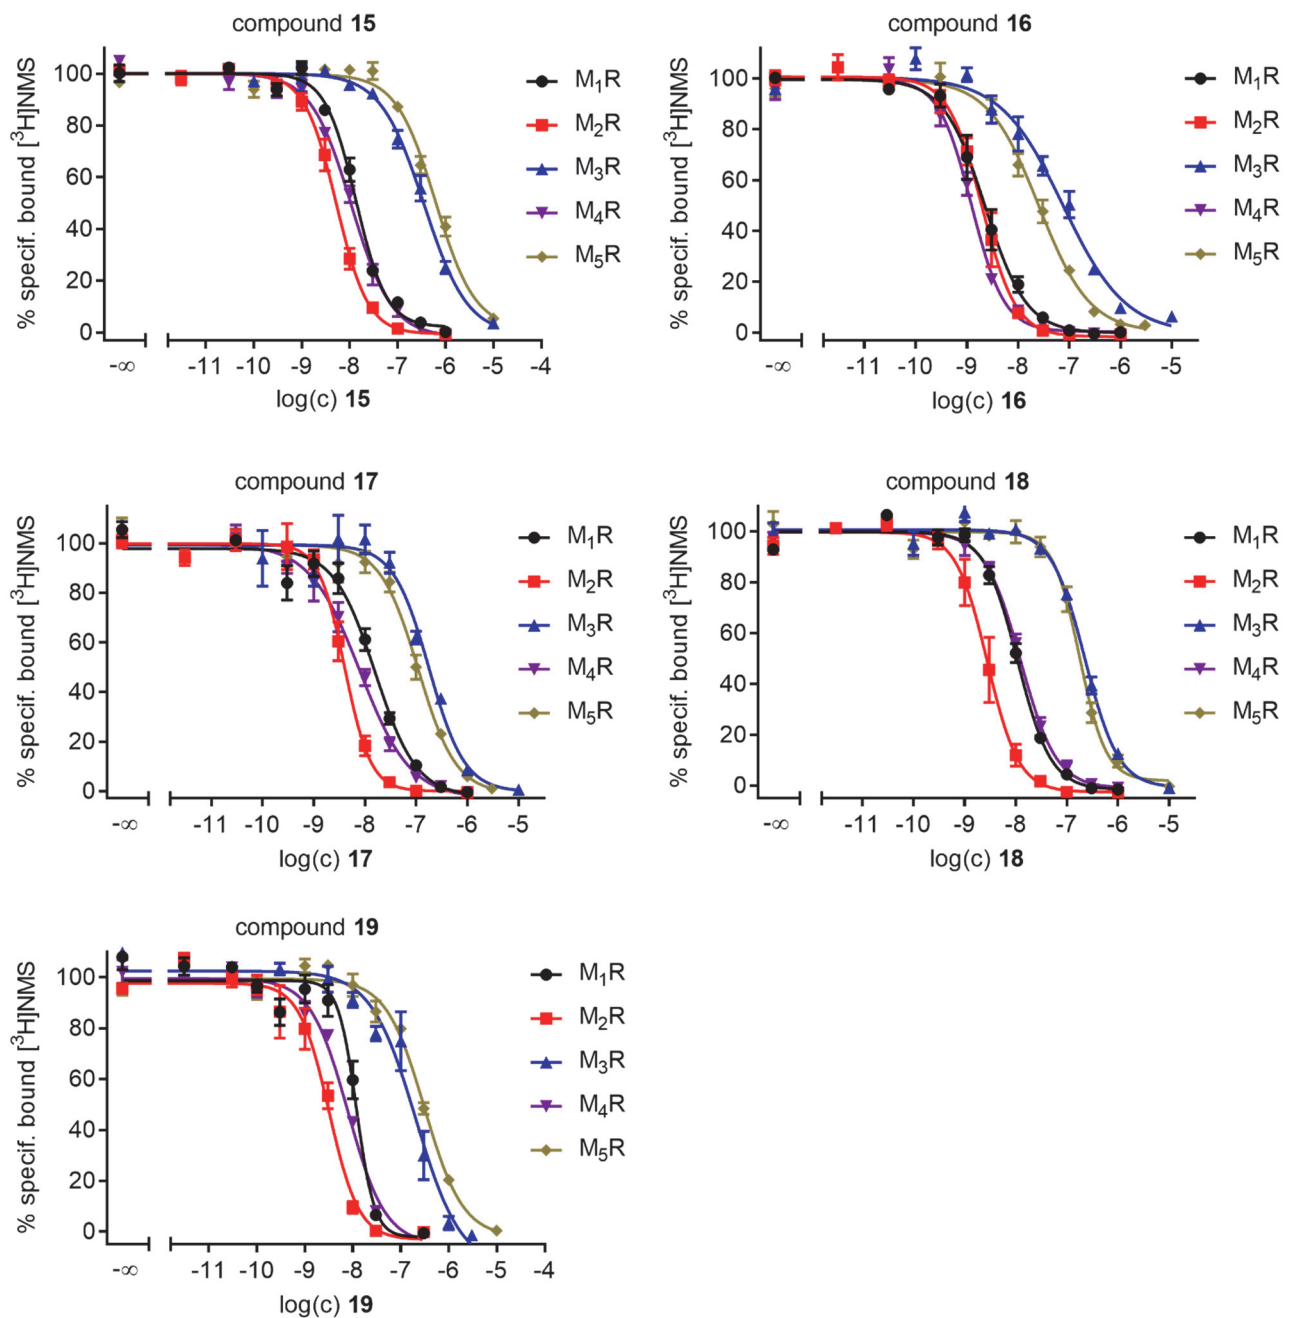

**Figure S1.** Radioligand displacement curves obtained from competition binding experiments with [<sup>3</sup>H]NMS (0.2 nM (M<sub>1</sub>R, M<sub>2</sub>R, M<sub>3</sub>R), 0.1 nM (M<sub>4</sub>R) or 0.3 nM (M<sub>5</sub>R)) and **15-19** at intact CHO-hM<sub>x</sub>R cells (x = 1-5). Data represent are mean values ± SEM from at least three independent experiments (each performed in triplicate).

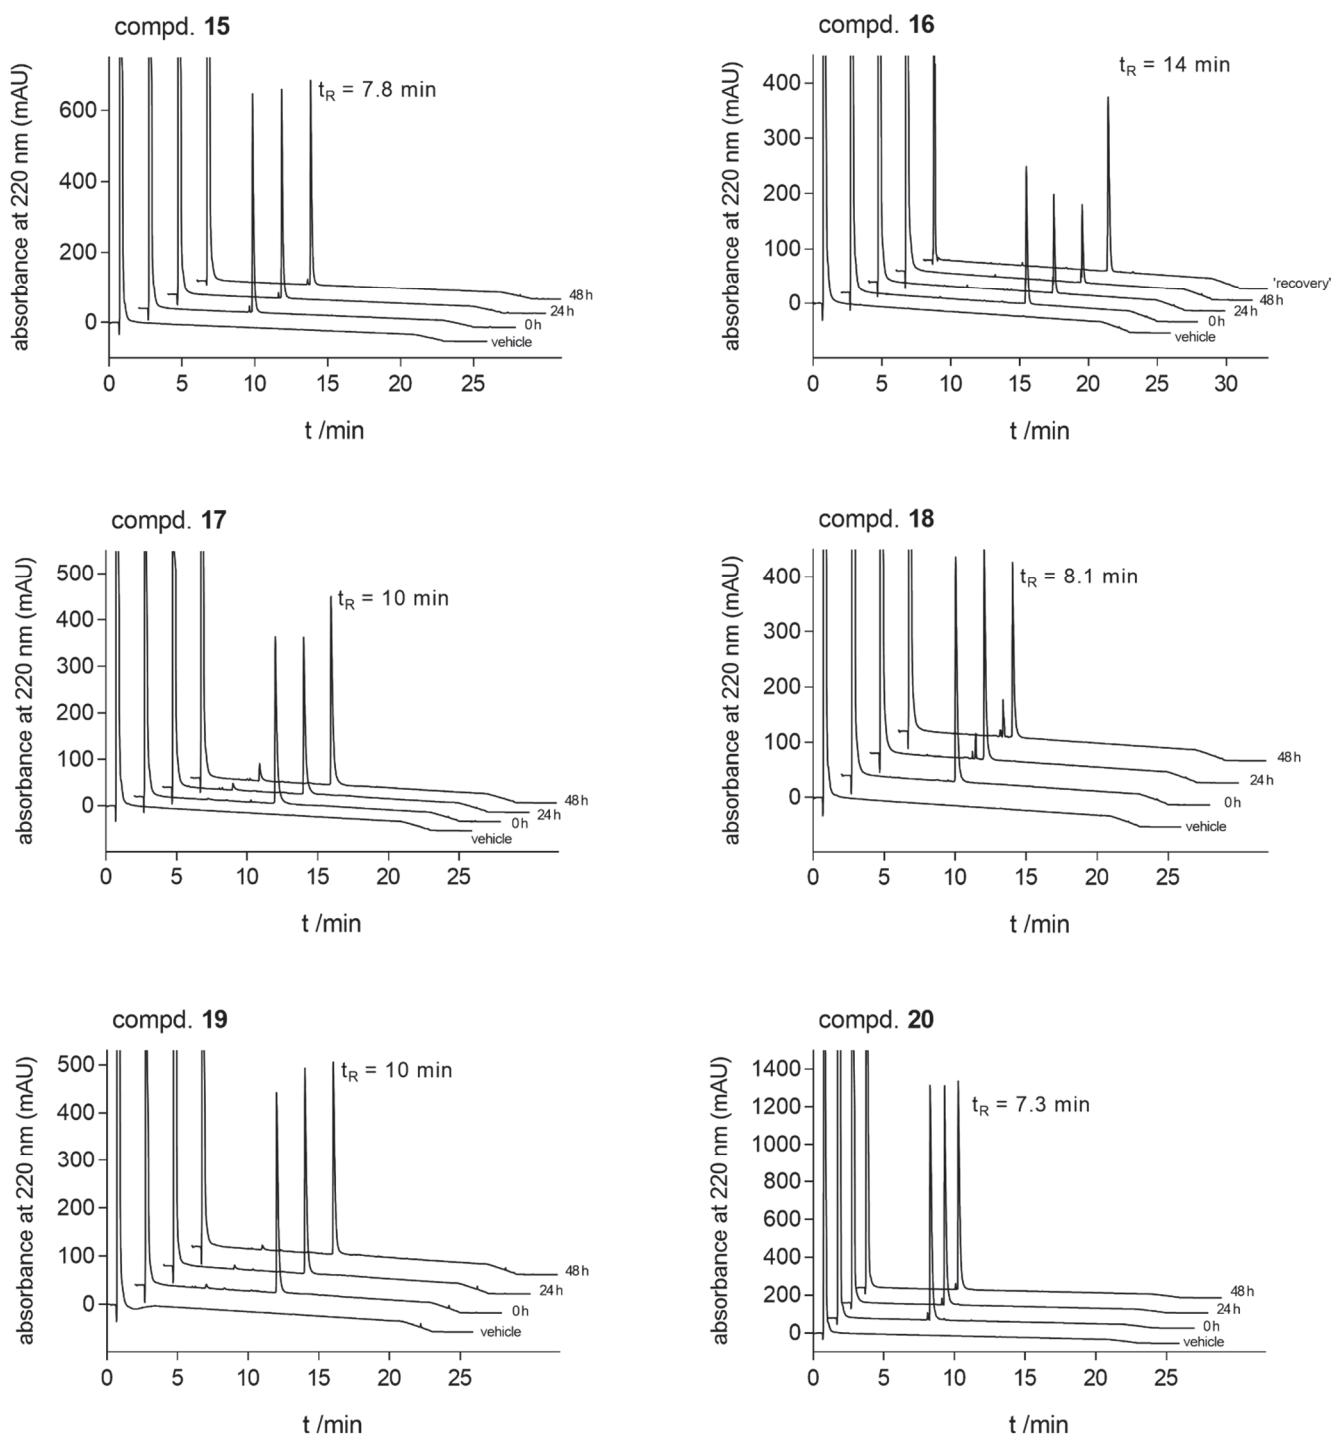

**Figure S2.** Chromatograms of the HPLC analysis (method see general experimental conditions) of compounds **15-20** after incubation in PBS (pH 7.4) at 22 °C for up to 48 h. Whereas compounds **15**, **16**, **19** and **20** showed no decomposition, compounds **17** and **18** showed minor decomposition after 24 h. Compound **16** showed high adsorption to the surface of the polypropylene vessel immediately upon sample preparation. After 48 h, adsorbed **16** was desorbed by replacement of the residual original solution (PBS, pH 7.4) with 0.1% aq TFA/acetonitrile (1:1 v/v, 60  $\mu$ L) ('recovery'). For injection, this solution was 1:1 diluted with water.

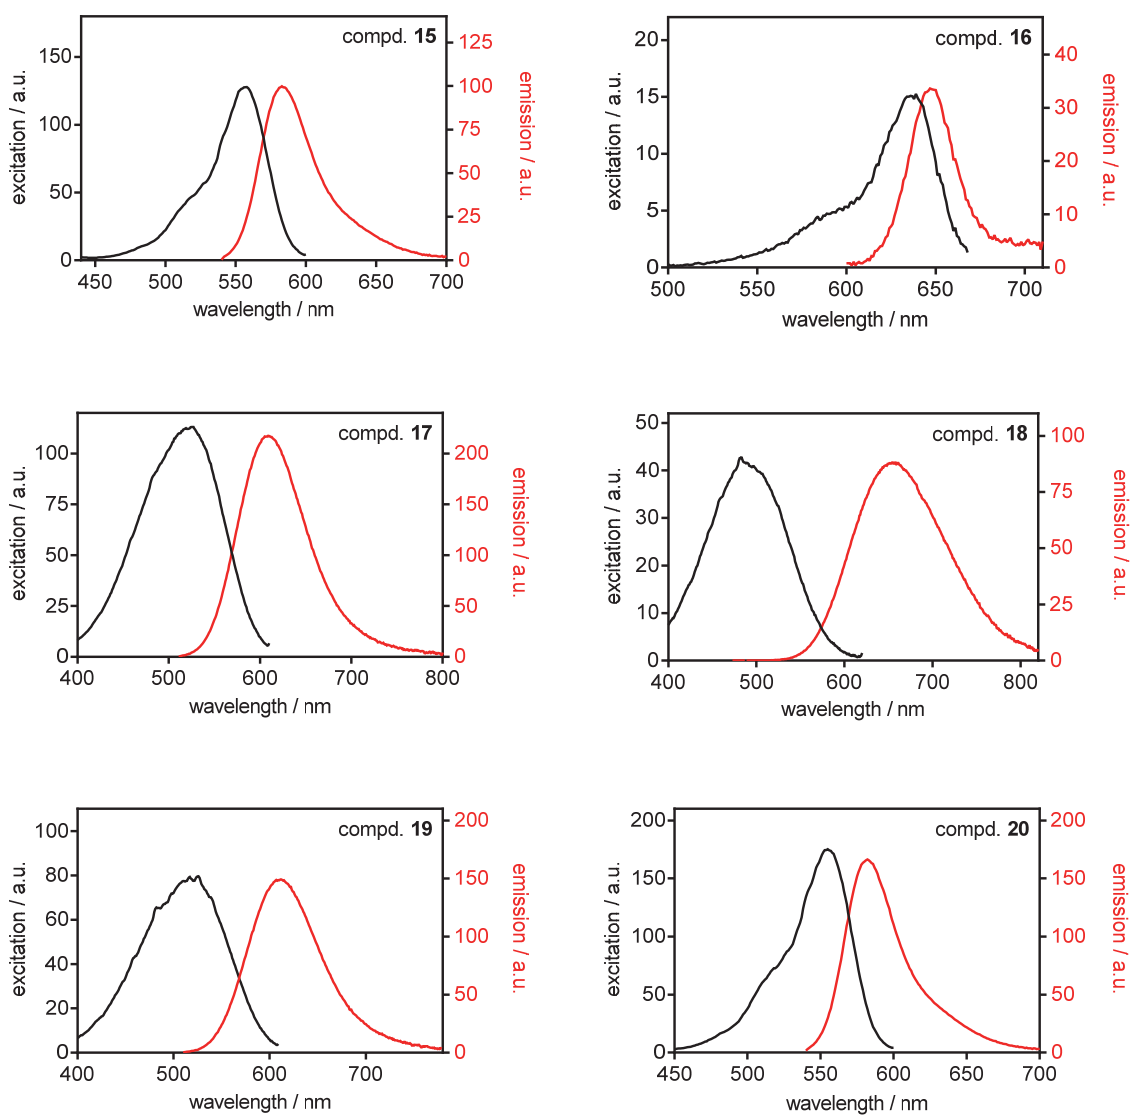

**Figure S3.** Excitation and corrected emission spectra of fluorescent ligands **15-20** recorded in PBS, pH 7.4, containing 1% BSA, at 22 °C using fluorescent ligand concentrations of 3  $\mu$ M (**15**, **16**, **20**) or 5  $\mu$ M (**17**, **18**, **19**).

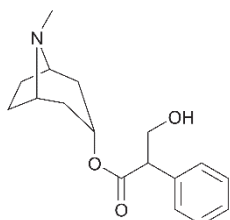

**21** (atropine)

**Figure S4.** Structure of the MR antagonist atropine (**21**).

## 2. RP-HPLC chromatograms of compounds 15-20

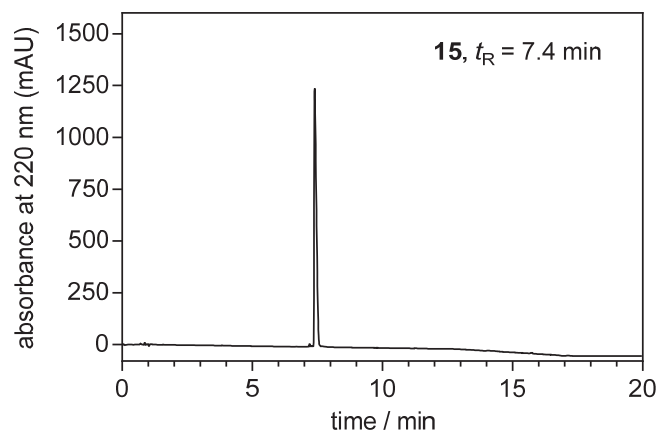

Chromatogram of the RP-HPLC analysis (purity control) of compound **15**

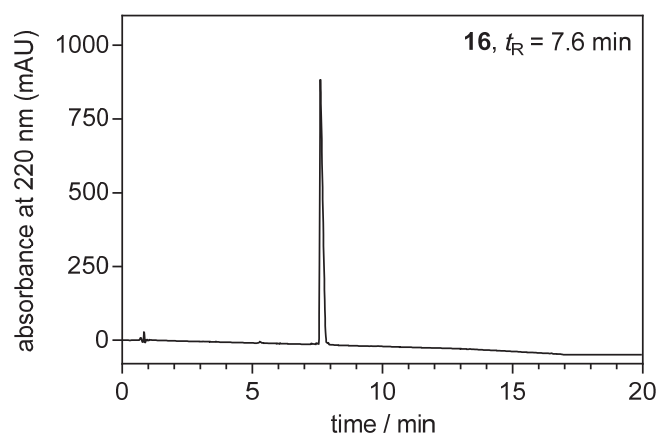

Chromatogram of the RP-HPLC analysis (purity control) of compound **16**

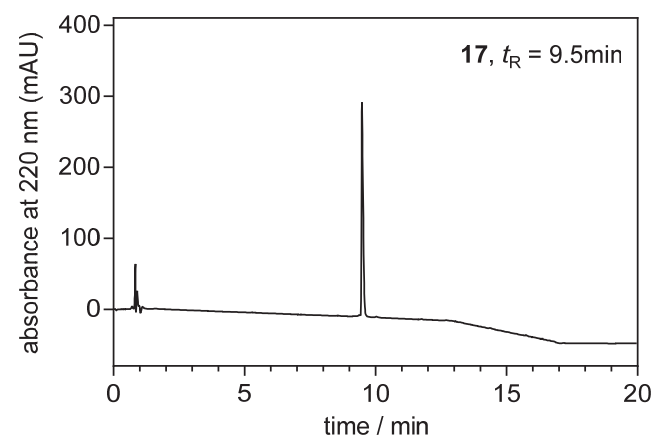

Chromatogram of the RP-HPLC analysis (purity control) of compound **17**

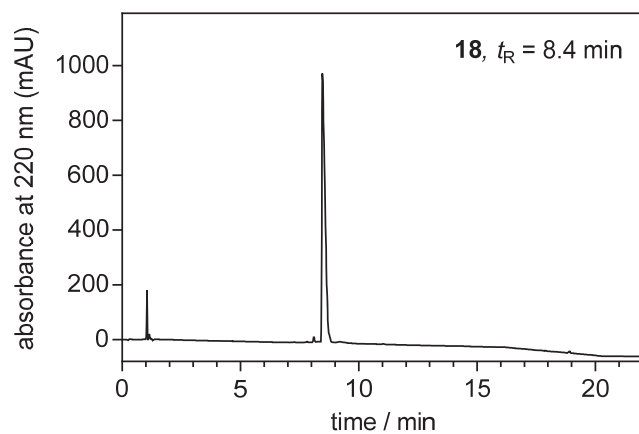

Chromatogram of the RP-HPLC analysis (purity control) of compound **18**

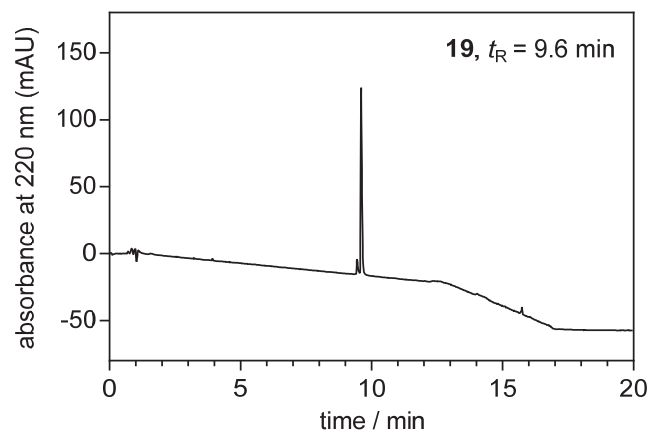

Chromatogram of the RP-HPLC analysis (purity control) of compound **19**

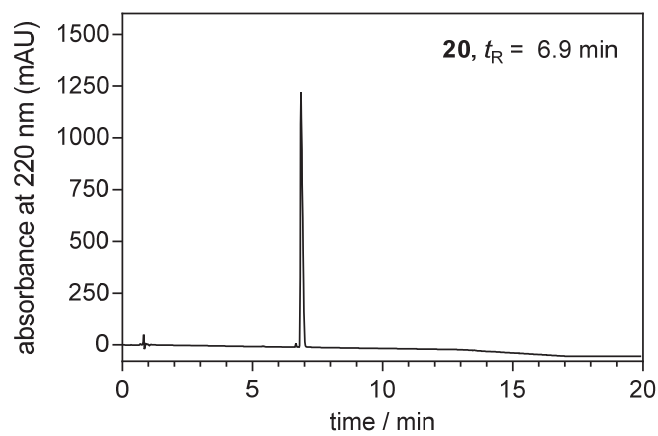

Chromatogram of the RP-HPLC analysis (purity control) of compound **20**

### 3. <sup>1</sup>H-NMR spectra of compounds 15-20

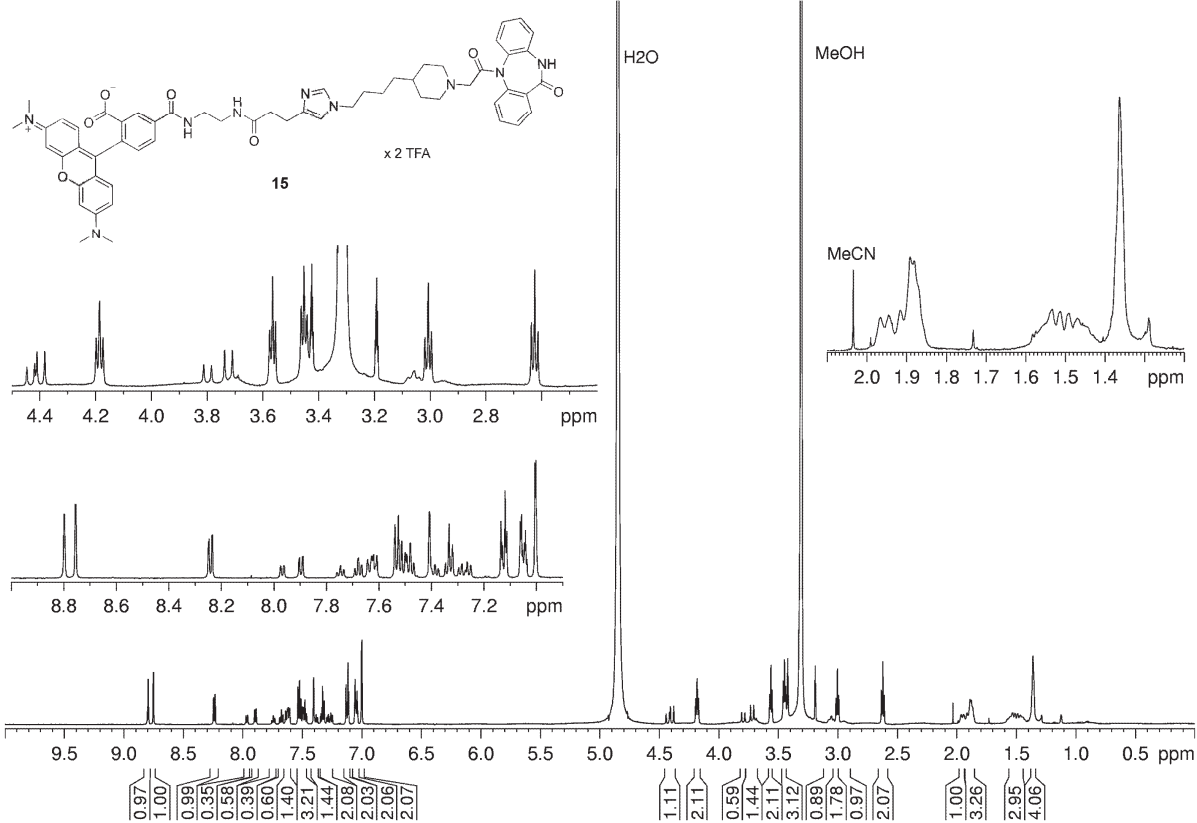

<sup>1</sup>H-NMR spectrum (600 MHz, MeOH-*d*<sub>4</sub>) of compound **15**

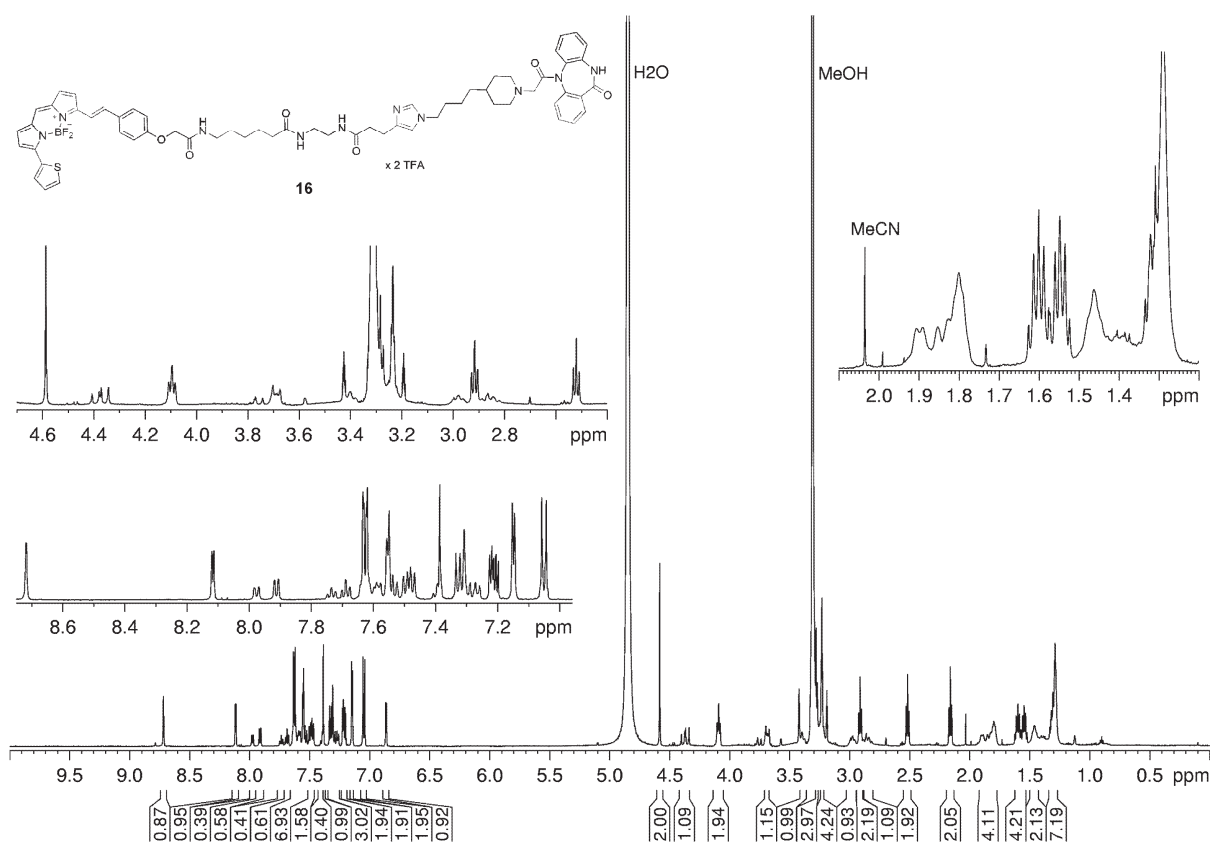

<sup>1</sup>H-NMR spectrum (600 MHz, MeOH-*d*<sub>4</sub>) of compound **16**

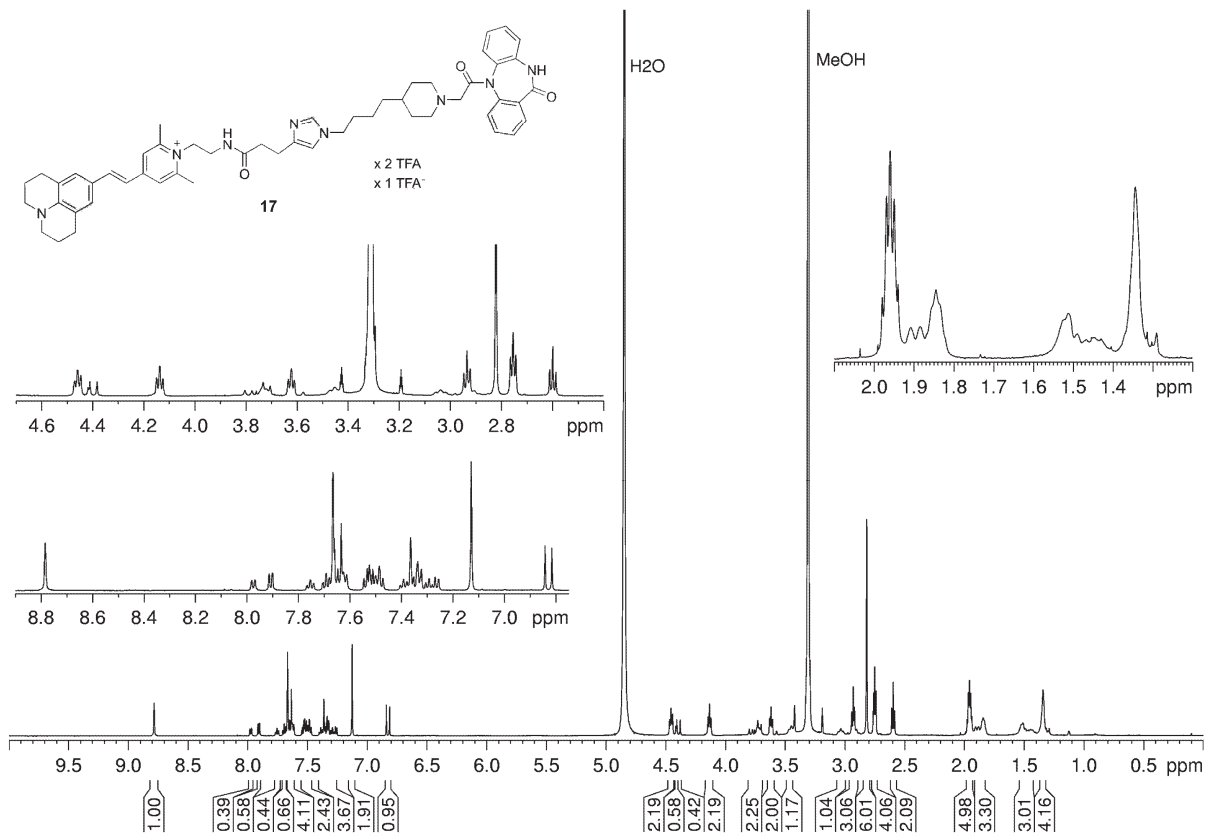

<sup>1</sup>H-NMR spectrum (600 MHz, MeOH-*d*<sub>4</sub>) of compound **17**

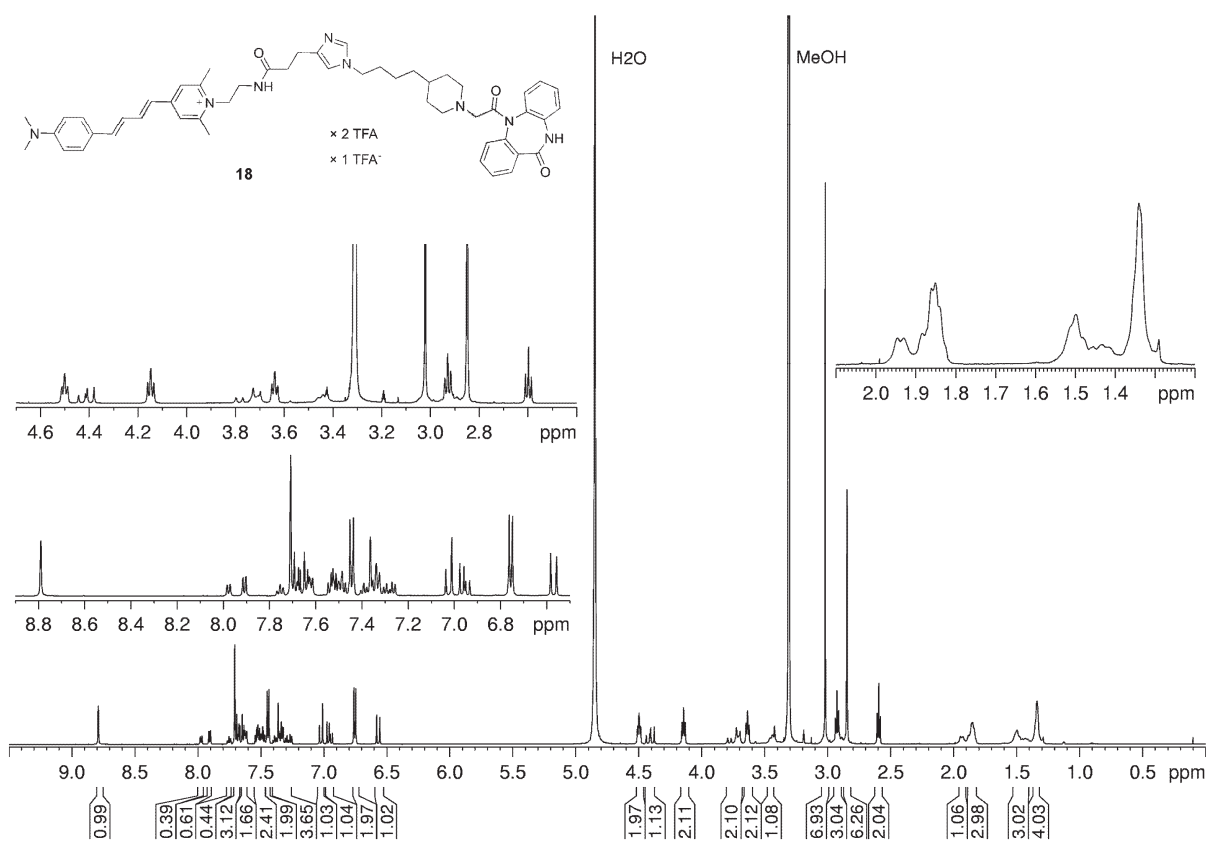

<sup>1</sup>H-NMR spectrum (600 MHz, MeOH-*d*<sub>4</sub>) of compound **18**



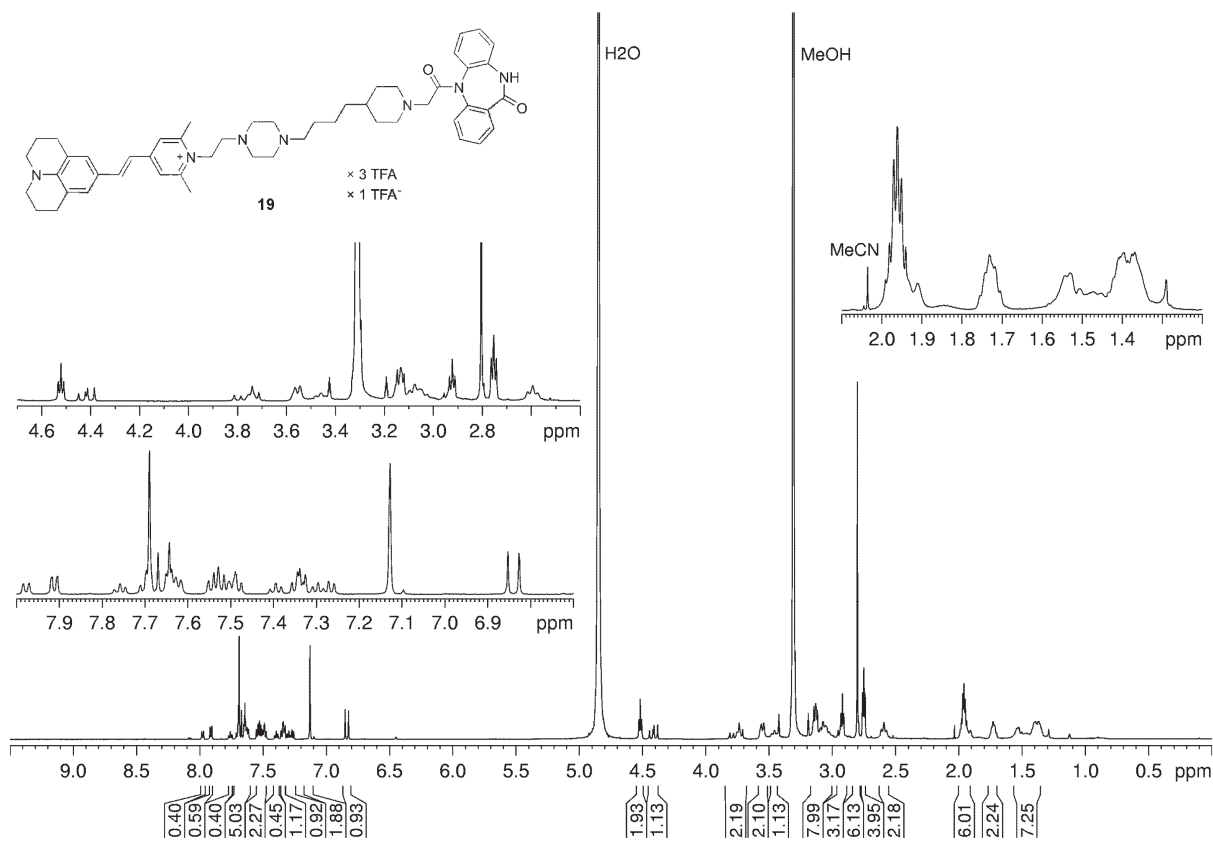

$^1\text{H-NMR}$  spectrum (600 MHz,  $\text{MeOH-}d_4$ ) of compound **19**

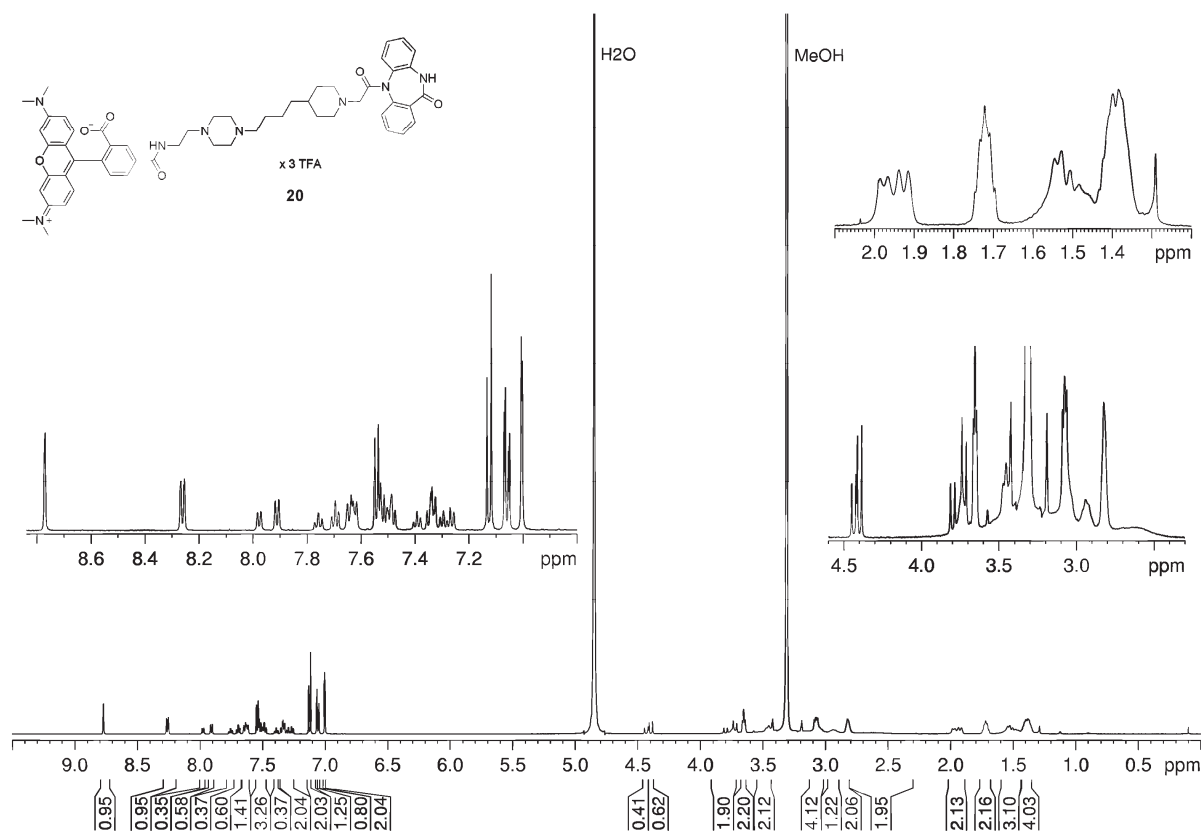

$^1\text{H-NMR}$  spectrum (600 MHz,  $\text{MeOH-}d_4$ ) of compound **20**
